# Supplementary material for: Merkel Cell Polyomavirus Small T Antigen Activates Noncanonical NF-κB Signaling to Promote Tumorigenesis
Source: Oxford University Press journal article supplement (doi:10.1158/1541-7786.mcr-20-0587), 2020-08-04
Supplement: 15417786mcr200587-sup-246528_1_supp_6413317_qd6nh0.xlsx [file 15417786mcr200587-sup-246528_1_supp_6413317_qd6nh0.xlsx]

## Sheet: Primers and Cloning
Name	Function	Sequence (5’-3’)
IL6_fwd	Human IL6 qPCR	CCACTCACCTCTTCAGAACG
IL6_rev		CATCTTTGGAAGGTTCAGGTTG
CSF2_fwd	Human GM-CSF qPCR	ACTTTCTGCTTGTCATCCCC
CSF2_rev		CCATCCTGAGTTTCTAGCTCTTG
IL8_fwd	Human IL8 qPCR	ATACTCCAAACCTTTCCACCC
IL8_rev		TCTGCACCCAGTTTTCCTTG
CCL26_fwd	Human CCL26 qPCR	GAGTGACATATCCAAGACCTGC
CCL26_rev		GGGTACAGACTTTCTTGCCTC
IL1B_fwd	Human IL1B qPCR	ATGCACCTGTACGATCACTG
IL1B_rev		ACAAAGGACATGGAGAACACC
CXCL10_fwd	Human CXCL10 qPCR	CCTTATCTTTCTGACTCTAAGTGGC
CXCL10_rev		ACGTGGACAAAATTGGCTTG
CCL11_fwd	Human CCL11 qPCR	AGATACCCCTTCAGCGACTAG
CCL11_rev		ACTTCATGGAATCCTGCACC
CCL13_fwd	Human CCL13 qPCR	CACTCAACGTCCCATCTACTTG
CCL13_rev		AGATCTCCTTGCCCAGTTTG
CCL25_fwd	Human CCL25 qPCR	TCGTCCAAGTTTAGCAATCCC
CCL25_rev		TGTAGGGCGACGGTTTTATC
CCL3_fwd	Human CCL3 qPCR	ACCAGTTCTCTGCATCACTTGC
CCL3_rev		TGCTCGTCTCAAAGTAGTCAGC
CCL8_fwd	Human CCL8 qPCR	AACCTTCACCTCTCATGCTG
CCL8_rev		TGGAAACTGAATCTGGCTGAG
CXCL3_fwd	Human CXCL3 qPCR	CCGAAGTCATAGCCACACTCAA
CXCL3_rev		GTGCTCCCCTTGTTCAGTATCTT
CXCL5_fwd	Human CXCL5 qPCR	ccagcaacctgccctataaa
CXCL5_rev		acaccacttccaccttggag
EGF_fwd	Human EGF qPCR	GATGGTTCAAAACGCCGAAG
EGF_rev		CGTACTCTATCTTTGCCAGTCC
RELB_fwd	Human RELB qPCR	ATTGACCCCTACAACGCTG
RELB_rev		TTTCTTGTCATAGACGGGCTC
NFKB2_fwd	Human NFKB2 qPCR	GAAGCCAGTCATCTCCCAG
NFKB2_rev		CATCTTTCTGCACCTTGTCAC
MLL2_fwd	Human MLL2 qPCR	ATCAAAGTCATCGAGCAGGG
MLL2_rev		TGTCAGCCTCTTTTCTCATGG
MLL4_fwd	Human MLL4 qPCR	TTAGAGAACGTGTGGCTGATG
MLL4_rev		AGGCAGAATGGGTGGAATG
SETD1A_fwd	Human SETD1A qPCR	CCTCCCAGTCCCTAAGTTTAAG
SETD1A_rev		TCTCTACCTCTTCCACCTCAC
SETD1B_fwd	Human SETD1B qPCR	GGGAGAAGCGTTATGAGGAC
SETD1B_rev		TGATCACCTTGGCATAGCAG
MMP1_fwd	Human MMP1 qPCR	GCACAAATCCCTTCTACCCG
MMP1_rev		TGAACAGCCCAGTACTTATTCC
MMP2_fwd	Human MMP2 qPCR	ACCCATTTACACCTACACCAAG
MMP2_rev		TGTTTGCAGATCTCAGGAGTG
MMP3_fwd	Human MMP3 qPCR	CCAGGGATTAATGGAGATGCC
MMP3_rev		AGTGTTGGCTGAGTGAAAGAG
MMP7_fwd	Human MMP7 qPCR	TTCGATGAGGATGAACGCTG
MMP7_rev		GGATCTCCATTTCCATAGGTTGG
MMP10_fwd	Human MMP10 qPCR	GACTCCACTCACATTCTCCAG
MMP10_rev		CCATAAAGCCCAGGTCCAG
MMP14_fwd	Human MMP14 qPCR	TGCCTACCGACAAGATTGATG
MMP14_rev		ATCCCTTCCCAGACTTTGATG
HPyV6_Early_NO3XFLAG (N)_F	HPyV6 sT cloning	ATCGCATAACTGTATGGATCGCCTTTTAGCCAGAGAA
HPyV6_sT_3XFLAG (N)_R		TCTAGCCAGCGGCCGCTTACCACCAGATGAGCTTCTC
HPyV7_Early_NO3XFLAG (N)_F	HPyV7 sT cloning	ATCGCATAGGATCCATGGACAAGCTTTTAGGTAGA
HPyV7_sT_3XFLAG (N)_R		TCTAGCCAGCGGCCGCTTACAGTAGATTTAGCTGTCC
MCV_Early_3XFLAG (N)_F	MCPyV sT cloning	ATCGCATAACTAGTATGGACTACAAAGACGATGACGACAAGGACTACAAAGACGATGACGACAAGGACTACAAAGACGATGACGACAAGGATTTAGTCCTAAATAGGAAA
MCV_sT_3XFLAG (N)_R		TCTAGCCAGCGGCCGCCTAGAAAAGGTGCAGATGCAG
NFKB2_ChIP_1_fwd	NFKB2 ChIP qPCR	AGCCCAAATCGAGAGCCATA
NFKB2_ChIP_1_rev		AGCTTGCCCCAGACGTTTT
NFKB2_ChIP_2_fwd		AAACAGCCCAAATCGAGAGC
NFKB2_ChIP_2_rev		TCCCTTAGGCTTATGGTAGAACA
NFKB2_ChIP_3_fwd		TCCTCTTCCGCTAACTTCCC
NFKB2_ChIP_3_rev		ACGCTTGGCTTTCTCTGAAG
NFKB2_ChIP_4_fwd		AACTTCCTTCCTCTTCCGCT
NFKB2_ChIP_4_rev		CCTAACGCTTGGCTTTCTCT
RELB_ChIP_1_fwd	RELB ChIP qPCR	AGTTTCCCGTCTGTAAAGTGG
RELB_ChIP_1_rev		CGCCCAGCCTGTTTTCTATT
RELB_ChIP_2_fwd		AATAGAAAACAGGCTGGGCG
RELB_ChIP_2_rev		GTTCAAGCGATTCTCCTGCC
RELB_ChIP_3_fwd		GAGCTGAGATCGCACCACT
RELB_ChIP_3_rev		GGACTACAGGCACACACCA
RELB_ChIP_4_fwd		CACTTTGGGAGGCTGAGGTA
RELB_ChIP_4_rev		GTTTCACCATGTTGCCCAAG
shGFP	Control shRNA	GCAAGCTGACCCTGAAGTTCAT
shRELB_1	RELB shRNA-1	GCTGCGGATTTGCCGAATTAA
shRELB_2	RELB shRNA-2	GCTGCGGATTTGCCGAATTAA
shRELB_3	RELB shRNA-3	AGCCCGTCTATGACAAGAAAT
shNFKB2_1	NFKB2 shRNA-1	GGACATGACTGCCCAATTTAA
shNFKB2_2	NFKB2 shRNA-2	TCCAAACAGTTCACCTATTAC
shIKKA_1	IKKA shRNA-1	GCTCTCTTGAAGGTTGATGTA
shIKKA_2	IKKA shRNA-2	GCTGACAATACTGTCATGTTT
shMAP3K14_1	NIK shRNA-1	GCAGCTGGAAATAGAATTATT
shMAP3K14_2	NIK shRNA-2	CTCGATCAGAACTCCACAAAC
MCPyV-sT_fwd	MCC tumor viral testing	TTAGCTGTAAGTTGTCTCGCC
MCPyV-sT_rev		CACCAGTCAAAACTTTCCCAAG

## Sheet: Antibodies
Name	Source	Use
1t1	Gift from Chris Buck	Anti-HPyV6/7 sT
Anti-FLAG-HRP, M2	Sigma Aldrich A8592	Immunoblotting
Anti-FLAG, M2	Sigma Aldrich F1804	ChIP
Anti-EZH2	CST#5246
Anti-p53	Santa cruz 126
Anti-p21	CST#2947
Anti-p16	R&D systems AF5779
NF-κB Pathway sampler kit	CST#9936T
NF-κB non-canonical Pathway Antibody sampler kit	CST#4888T
NF-κB Family member antibody sampler kit	CST#4766T
Anti-H3K4me3	Active motif#39016
Anti-HSP90	CST#4877
Anti-HDAC2	CST#5113
Anti-H3	CST#4499
Anti-FBXW7	Ab-109617
Anti-BrdU	BD-555627
Anti-Rabbit-HRP	CST#7074
Anti-Mouse-HRP	CST#7076
Anti-Goat-HRP	Santa cruz 2020

## Sheet: Chemical and Reagents
Name	Source
Calcitriol	Cayman Chemical #71820
WDR5-0103	Cayman Chemical #13945
OICR9429	Cayman Chemical #16095
SN52	Customized by Biomatik
SN52mut	Customized by Biomatik
SA beta gal staining kit	Cell Signaling Technologies#9860
subcellular fractionation kit	Thermo Scientific #78840
Lipofectamin 3000	Invitrogen #L3000015
TRIzol	Invitrogen #15596026
Rneasy miniprep kit	QIAGEN #74134
iScript cDNA synthesis kit	Bio-Rad #1708891
2XSYBR green PCR master mix	Applied Biosystems # A25780
Human IL8 ELISA kit	Peprotech #900-K18
MTT	Invitrogen #M6494
BrdU	Invitrogen #B23151
FBS	Sigma #F2442
DMEM	Sigma #D5796
RPMI1640	Sigma #R0883
InFusion cloning kit	Clontech #638910
SpeI	NEB#R3133S
MluI	NEB#R3198S
BamHI	NEB#R3136S
NotI	NEB#R3189S
Blasticidin	Gibco #A1113903
Hygromycin	Gibco #10687010
Puromycin	Sigma #P8833
4-well Chamber Slides	Thermo Scientific #177399
Doxycycline	Sigma #D9891
Normal goat serum	Cell Signaling Technologies#177399
BCA assay kit	Thermo Scientific # 23227
T-PER protein extraction buffer	Thermo Scientific #78510
ECL reagent	PerkinElmer #NEL103001
Annexin V/PI apoptosis kit	Roche #11858777001
